# Supplementary material
Source: PubMed Central journal article supplement (PMC5179300)
Supplement: NIHMS829391-supplement.pdf [file NIHMS829391-supplement.pdf]

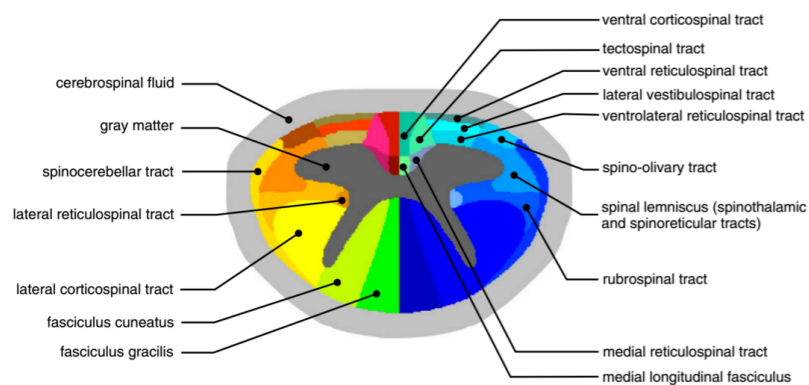

|                                                                   | T1 (s)               |                     | MTV                  |                     | <i>fr</i>            |                     | <i>Dh</i> ( $\mu\text{m}^2/\text{ms}$ ) |                     | axon diameter ( $\mu\text{m}$ ) |                     | g-ratio              |                     |
|-------------------------------------------------------------------|----------------------|---------------------|----------------------|---------------------|----------------------|---------------------|-----------------------------------------|---------------------|---------------------------------|---------------------|----------------------|---------------------|
|                                                                   | mean across subjects | std across subjects | mean across subjects | std across subjects | mean across subjects | std across subjects | mean across subjects                    | std across subjects | mean across subjects            | std across subjects | mean across subjects | std across subjects |
| <b>fasciculus gracilis</b>                                        | 1.27                 | 0.12                | 0.28                 | 0.04                | 0.47                 | 0.06                | 1.12                                    | 0.25                | 6.4                             | 0.32                | 0.76                 | 0.05                |
| <b>fasciculus cuneatus</b>                                        | 1.20                 | 0.14                | 0.29                 | 0.04                | 0.53                 | 0.07                | 1.08                                    | 0.28                | 6.9                             | 0.20                | 0.76                 | 0.04                |
| <b>lateral corticospinal tract</b>                                | 1.30                 | 0.17                | 0.27                 | 0.04                | 0.49                 | 0.06                | 1.01                                    | 0.25                | 7.0                             | 0.27                | 0.76                 | 0.04                |
| <b>spinocerebellar tract</b>                                      | 0.53                 | 0.48                | 0.27                 | 0.06                | 0.35                 | 0.13                | 1.81                                    | 0.33                | 8.3                             | 0.41                | 0.72                 | 0.06                |
| <b>rubrospinal tract</b>                                          | 1.31                 | 0.11                | 0.29                 | 0.04                | 0.51                 | 0.08                | 0.84                                    | 0.26                | 6.8                             | 0.25                | 0.76                 | 0.04                |
| <b>lateral reticulospinal tract</b>                               | 1.22                 | 0.09                | 0.28                 | 0.04                | 0.47                 | 0.07                | 0.96                                    | 0.12                | 6.9                             | 0.32                | 0.77                 | 0.04                |
| <b>spinal lemniscus (spinothalamic and spinoreticular tracts)</b> | 1.31                 | 0.12                | 0.28                 | 0.04                | 0.48                 | 0.05                | 0.82                                    | 0.13                | 6.6                             | 0.20                | 0.76                 | 0.04                |
| <b>spino-olivary tract</b>                                        | 0.83                 | 0.20                | 0.30                 | 0.05                | 0.42                 | 0.07                | 1.28                                    | 0.28                | 7.1                             | 0.80                | 0.72                 | 0.05                |
| <b>ventrolateral reticulospinal tract</b>                         | 1.28                 | 0.14                | 0.26                 | 0.04                | 0.40                 | 0.12                | 1.07                                    | 0.20                | 6.7                             | 0.34                | 0.74                 | 0.03                |
| <b>lateral vestibulospinal tract</b>                              | 1.36                 | 0.09                | 0.28                 | 0.04                | 0.48                 | 0.07                | 0.99                                    | 0.14                | 6.6                             | 0.31                | 0.75                 | 0.04                |
| <b>ventral reticulospinal tract</b>                               | -0.06                | 0.60                | 0.34                 | 0.05                | 0.32                 | 0.17                | 1.33                                    | 0.42                | 8.1                             | 1.81                | 0.64                 | 0.06                |
| <b>ventral corticospinal tract</b>                                | 1.21                 | 0.11                | 0.29                 | 0.04                | 0.46                 | 0.08                | 1.20                                    | 0.34                | 7.0                             | 0.38                | 0.74                 | 0.04                |
| <b>tectospinal tract</b>                                          | 1.29                 | 0.11                | 0.28                 | 0.04                | 0.46                 | 0.12                | 1.10                                    | 0.18                | 6.7                             | 0.27                | 0.75                 | 0.04                |
| <b>medial reticulospinal tract</b>                                | 1.31                 | 0.12                | 0.27                 | 0.04                | 0.44                 | 0.15                | 1.21                                    | 0.20                | 6.8                             | 0.19                | 0.76                 | 0.04                |
| <b>medial longitudinal fasciculus</b>                             | 1.32                 | 0.09                | 0.27                 | 0.04                | 0.44                 | 0.16                | 1.19                                    | 0.15                | 6.7                             | 0.24                | 0.76                 | 0.05                |

**Supplementary S1:** Results per tract of quantitative metrics (T1, MTV, *fr*, *Dh*, axon diameter, g-ratio). For each metric the mean and the standard deviation across subjects was computed. For each metric, tracts that presented the highest deviation across subjects were highlighted in red. Sensory tracts are highlight in blue and motor tracts in red.
